# Supplementary material
Source: HighWire-hosted journal article supplement (https://bmjopen.bmj.com/content/10/2/e032594)

Number of actions, including both pharmaceutical intensification actions and non-pharmaceutical actions, deployed by the seven intervention practices

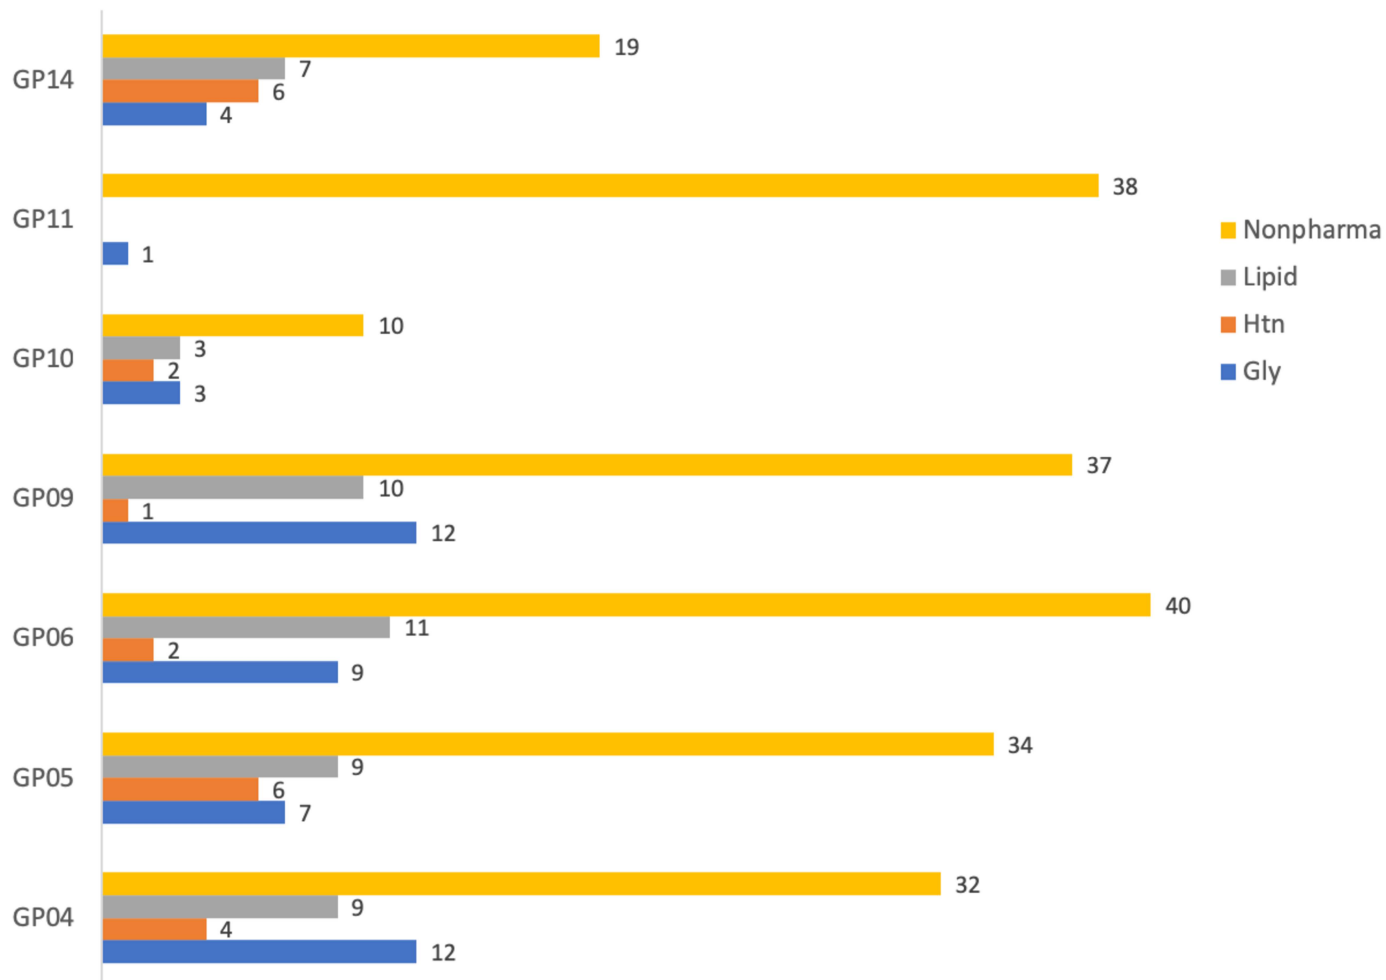

Supplement: inline-supplementary-material-7 [file inline-supplementary-material-7.pdf]
