# Supplementary material
Source: HighWire-hosted journal article supplement (https://bmjopen.bmj.com/content/10/2/e032594)

Additional File 3

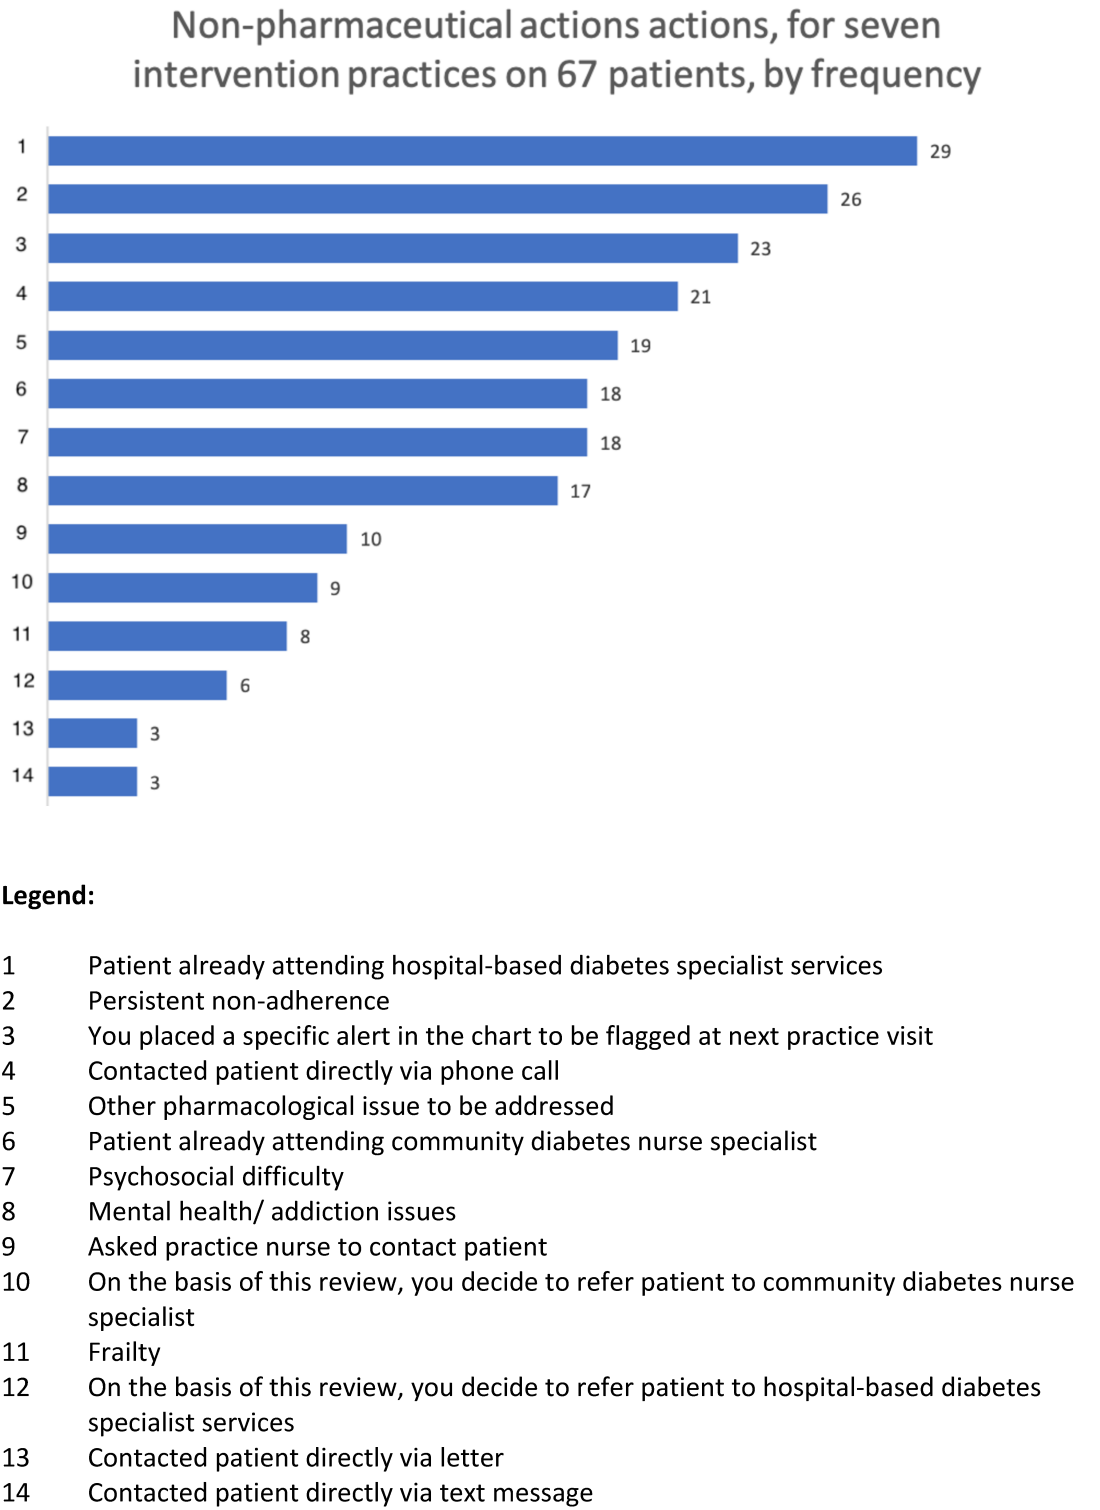

Supplement: inline-supplementary-material-8 [file inline-supplementary-material-8.pdf]
